# Supplementary material
Source: publisher site journal article supplement (https://www.dovepress.com/article/381427)
Supplement: Supplementary file 1 [file 30_Sep_2022_Supplementary_Figure_1_ID381427.pdf › 30_Sep_2022_Supplementary_Figure_1_ID381427.pdf]

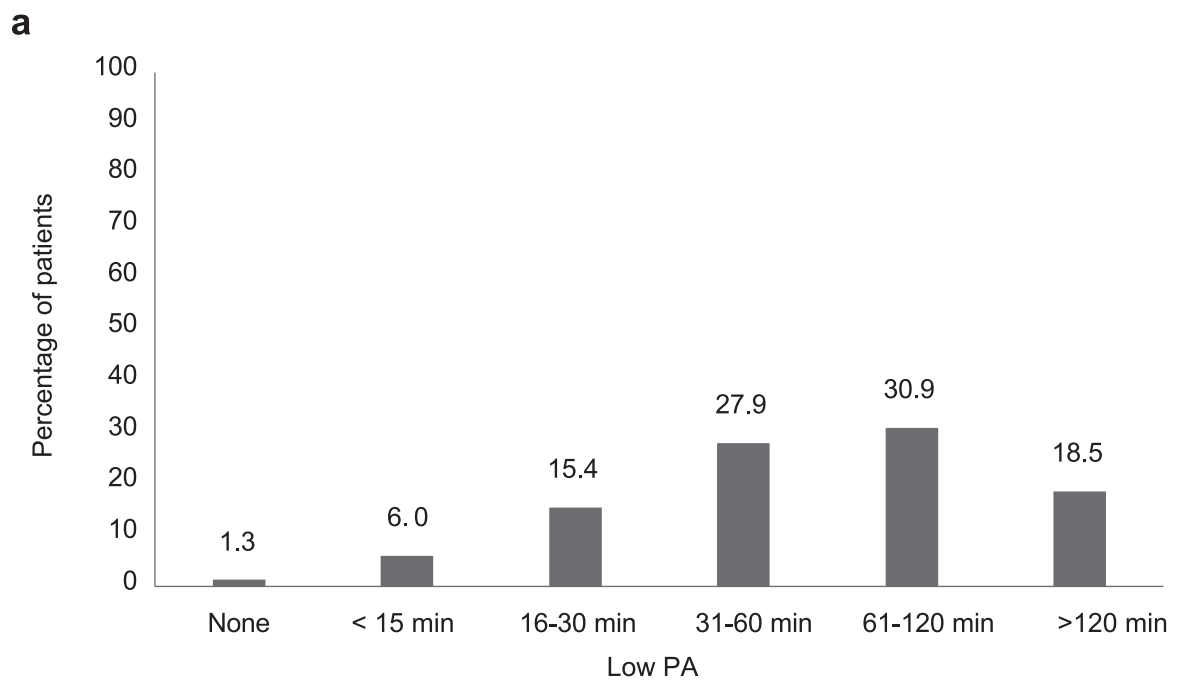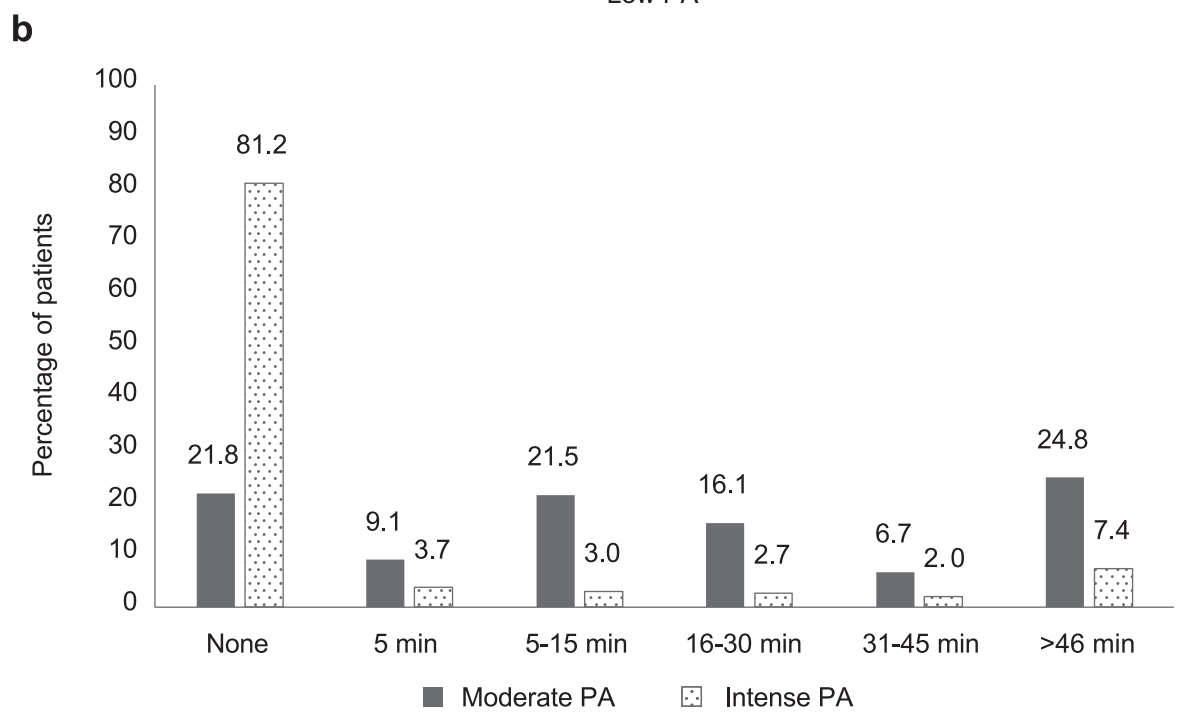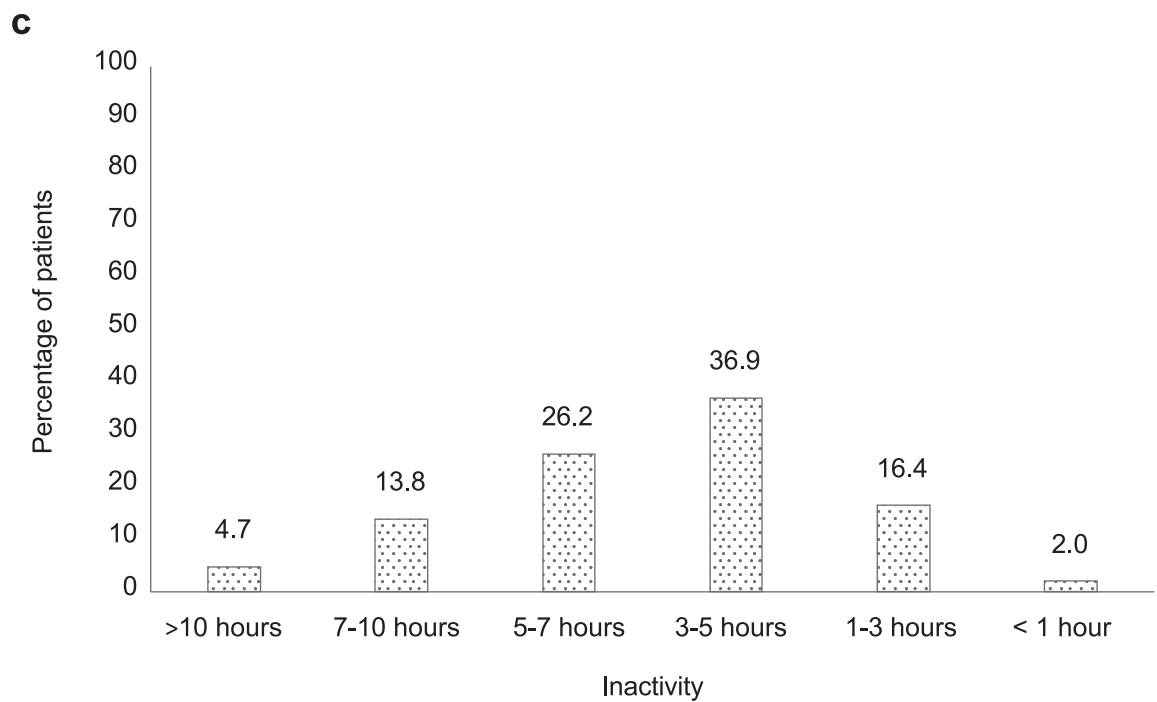

**Supplementary Figure 1.** Level of PA self-reported by patients using the SAQ-COPD questionnaire. a) low PA; b) moderate and intense PA; c) inactivity. **Abbreviations:** PA, physical activity; SAQ-COPD, Spanish Activity Questionnaire in COPD.
